# Supplementary material for: Acute Effects of Heat‐Not‐Burn, Electronic Vaping, and Traditional Tobacco Combustion Cigarettes: The Sapienza University of Rome‐Vascular Assessment of Proatherosclerotic Effects of Smoking (SUR‐VAPES) 2 Randomized Trial
Source: PubMed Central journal article supplement — J Am Heart Assoc. 2019 Mar 16;8(6):e010455. doi: 10.1161/JAHA.118.010455 (PMC6475061; doi:10.1161/jaha.118.010455), 2019-03-16

# **SUPPLEMENTAL MATERIAL**

## Data S1.

### Additional details on statistical analysis

Analysis was based on a long-formatted database, as the sample below:

| ID  | Order | Product | Timing   | Measurement |
|-----|-------|---------|----------|-------------|
| 1   | 1     | A       | Baseline | Y1          |
| 1   | 2     | A       | Post     | Y2          |
| 1   | 3     | B       | Baseline | Y3          |
| 1   | 4     | B       | Post     | Y4          |
| 1   | 5     | C       | Baseline | Y5          |
| 1   | 6     | C       | Post     | Y6          |
| 2   | 1     | B       | Baseline | Y7          |
| 2   | 2     | B       | Post     | Y8          |
| 2   | 3     | C       | Baseline | Y9          |
| 2   | 4     | C       | Post     | Y10         |
| 2   | 5     | A       | Baseline | Y11         |
| 2   | 6     | A       | Post     | Y12         |
| ... | ...   | ...     | ...      | ...         |

The model for the within-product before-after analysis was:

$$Y_{ij} = \beta_0 + \beta_1 \text{Time} + u_1 \text{ID} + u_2 \text{Order} + \varepsilon$$

with  $\beta$  representing the fixed effects,  $u$  the random effects, and  $\varepsilon$  the Gaussian error term.

The Stata code for the within-product before-after analysis was:

```
mixed Measurement Timing || ID:, || Order:, covariance(identity)
```

Conversely, the model for the between-product interaction analysis was:

$$Y_{ij} = \beta_0 + \beta_1 \text{Time} + \beta_2 \text{Product} + \beta_3 \text{Time} * \text{Product} + u_1 \text{ID} + u_2 \text{Order} + \varepsilon$$

with  $\beta$  representing the fixed effects,  $u$  the random effects, and  $\varepsilon$  the Gaussian error term.

Accordingly, the Stata code for the between-product interaction analysis was:

```
mixed Measurement Timing##Product || ID:, || Order:, covariance(identity)
```

A sample screenshot for the Stata output is the following:

```
. mixed FMD Pre0Post1##TC1EC2HNS3 || ID:, || Order:, covariance(identity)
```

Performing EM optimization:

Performing gradient-based optimization:

```
Iteration 0: log likelihood = -248.25534
Iteration 1: log likelihood = -246.75537
Iteration 2: log likelihood = -246.71072
Iteration 3: log likelihood = -246.71072
```

Computing standard errors:

```
Mixed-effects ML regression          Number of obs    =    115
```

| Group Variable | No. of Groups | Observations per Group |         |         |
|----------------|---------------|------------------------|---------|---------|
|                |               | Minimum                | Average | Maximum |
| ID             | 20            | 3                      | 5.8     | 6       |
| Order          | 58            | 1                      | 2.0     | 2       |

```
Log likelihood = -246.71072          Wald chi2(5)      =    91.50
                                     Prob > chi2       =    0.0000
```

| FMD                  | Coef.     | Std. Err. | z     | P> z  | [95% Conf. Interval] |           |
|----------------------|-----------|-----------|-------|-------|----------------------|-----------|
| 1.Pre0Post1          | -3.8114   | .5404618  | -7.05 | 0.000 | -4.870685            | -2.752114 |
| TC1EC2HNS3           |           |           |       |       |                      |           |
| 2                    | -.0707635 | .5545494  | -0.13 | 0.898 | -1.15766             | 1.016133  |
| 3                    | -.1178998 | .5404618  | -0.22 | 0.827 | -1.177185            | .9413859  |
| Pre0Post1#TC1EC2HNS3 |           |           |       |       |                      |           |
| 1 2                  | 1.389178  | .7785131  | 1.78  | 0.074 | -.1366801            | 2.915035  |
| 1 3                  | 1.5004    | .7580794  | 1.98  | 0.048 | .0145915             | 2.986208  |
| _cons                | 6.2149    | .6280043  | 9.90  | 0.000 | 4.984034             | 7.445766  |

| Random-effects Parameters | Estimate | Std. Err. | [95% Conf. Interval] |          |
|---------------------------|----------|-----------|----------------------|----------|
| ID: Identity              |          |           |                      |          |
| var(_cons)                | 4.871662 | 1.691218  | 2.467056             | 9.620007 |
| Order: Identity           |          |           |                      |          |
| var(_cons)                | 1.25e-17 | 6.91e-17  | 2.56e-22             | 6.14e-13 |
| var(Residual)             | 2.825853 | .4095205  | 2.127131             | 3.754094 |

```
LR test vs. linear regression:      chi2(2) =    70.26  Prob > chi2 = 0.0000
```

Note: LR test is conservative and provided only for reference.

**Table S1. Additional inferential analysis.**

| Feature                                              | Point estimate of effect (95% confidence interval) |                              |                               |
|------------------------------------------------------|----------------------------------------------------|------------------------------|-------------------------------|
|                                                      | EVC vs TC                                          | EVC vs HNBC                  | TC vs HNBC                    |
| Primary endpoints                                    |                                                    |                              |                               |
| Soluble Nox2-derived peptide (pg/mL)                 | -4.30 (-12.74; 4.14)                               | <b>-9.55 (-16.00; -3.10)</b> | <b>-13.85 (-22.29; -5.41)</b> |
| Flow-mediated dilation (%)                           | 1.39 (-0.14; 2.92)                                 | 0.11 (-1.25; 1.47)           | <b>1.50 (0.02; 2.97)</b>      |
| Additional endpoints                                 |                                                    |                              |                               |
| Nitric oxide bioavailability (μM)                    | 5.18 (-4.77; 15.13)                                | 3.35 (-5.73; 12.42)          | 8.52 (-1.42; 18.48)           |
| H <sub>2</sub> O <sub>2</sub> production (μmol/L)    | -4.58 (-9.89; 0.74)                                | -0.94 (-3.81; 1.94)          | <b>-5.51 (-10.83; -0.20)</b>  |
| H <sub>2</sub> O <sub>2</sub> breakdown activity (%) | <b>11.63 (0.64; 22.61)</b>                         | 8.76 (-1.40; 18.91)          | <b>20.38 (9.40; 31.37)</b>    |
| 8-iso-prostaglandin F-2α-III (pmol/L)                | <b>-44.4 (-66.1; -22.7)</b>                        | <b>-31.0 (-52.2; -9.8)</b>   | <b>-75.4 (-97.1; -53.7)</b>   |
| Vitamin E (μmol/mmol)                                | <b>1.09 (0.03; 2.15)</b>                           | <b>1.25 (0.22; 2.29)</b>     | -0.16 (-1.22; 0.90)           |
| Soluble CD40 ligand (ng/mL)                          | <b>-1.38 (-2.74; -0.02)</b>                        | 0.13 (-1.21; 1.47)           | -1.25 (-2.61; 0.11)           |
| Soluble P-selectin (ng/ml)                           | <b>-3.30 (-4.92; -1.68)</b>                        | -0.13 (-1.21; 0.96)          | <b>-3.43 (-5.04; -1.81)</b>   |
| Systolic blood pressure (mm Hg)                      | -2.05 (-4.64; 0.54)                                | -1.95 (-4.42; 0.52)          | <b>-4.00 (-6.59; -1.41)</b>   |
| Diastolic blood pressure (mm Hg)                     | -1.00 (-4.14; 2.24)                                | -2.20 (-4.87; 0.47)          | <b>-3.20 (-6.34; -0.06)</b>   |
| Mean blood pressure (mm Hg)                          | -1.35 (-3.93; 1.23)                                | -2.12 (-4.26; 0.03)          | <b>-3.47 (-6.05; -0.88)</b>   |
| Cotinine (ng/mL)                                     | 1.70 (-10.32; 13.72)                               | -2.20 (-14.31; 9.91)         | -0.50 (-12.52; 11.52)         |

EVC=electronic vaping cigarette; H<sub>2</sub>O<sub>2</sub>=hydrogen peroxide; HNBC=heat-not-burn cigarette; TC=traditional tobacco cigarette

**Figure S1. Consolidated Standards of Reporting Trials (CONSORT) subject flow diagram (left panel), and measurement protocol (right panel).** BP=blood pressure; EVC=electronic vapng cigarette; FMD=flow-mediated dilation; HNBC=heat-not-burn cigarette; TC=traditional tobacco cigarette.

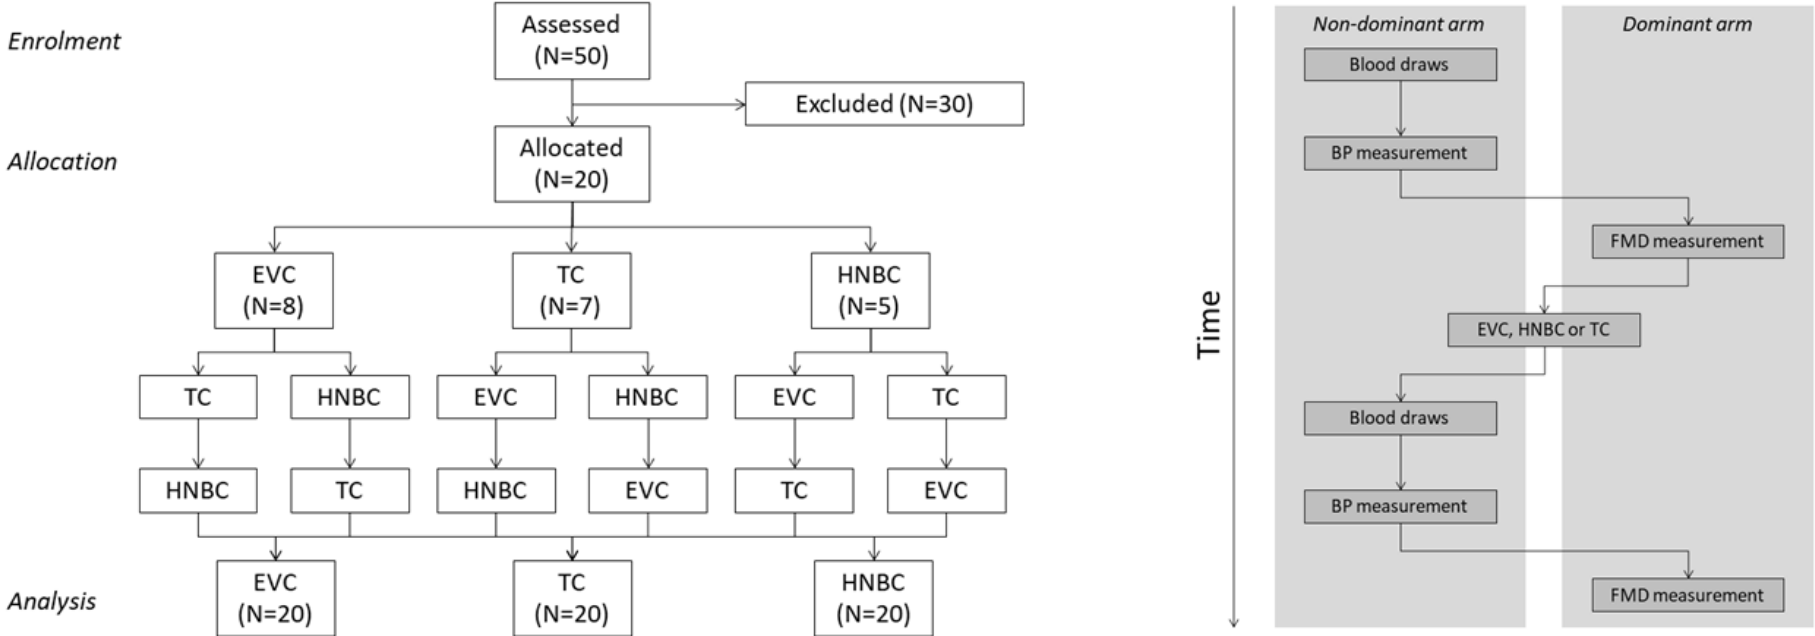

**Figure S2. Impact of using electronic vaping cigarette (EVC), traditional tobacco cigarette (TC), and heat-not-burn cigarette (HNBC) on hydrogen peroxide (H<sub>2</sub>O<sub>2</sub>) production.** Boxplots represent median, 1<sup>st</sup> quartile, 3<sup>rd</sup> quartile, 5<sup>th</sup> percentile, 95<sup>th</sup> percentile, and outliers.

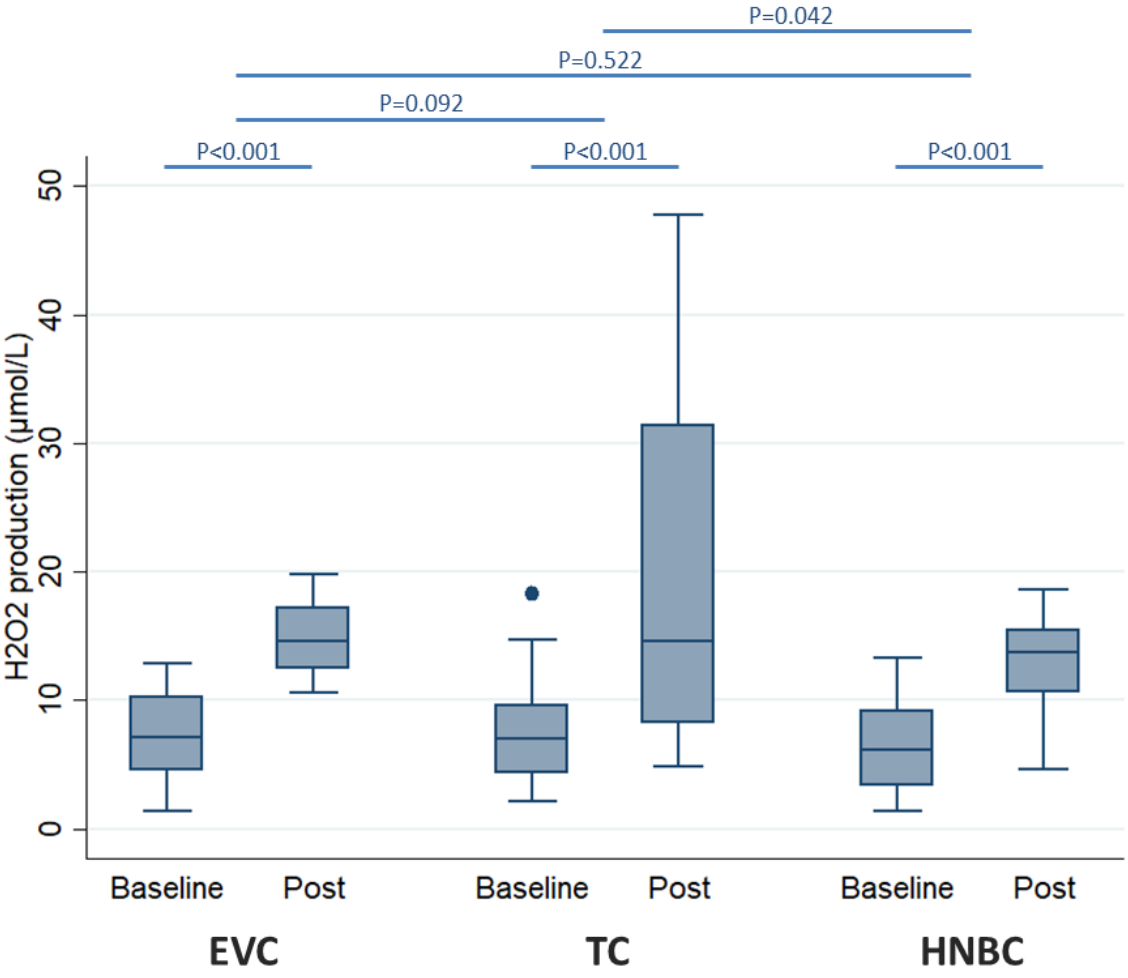

**Figure S3. Impact of using electronic vaping cigarette (EVC), traditional tobacco cigarette (TC), and heat-not-burn cigarette (HNBC) on 8-iso-prostaglandin F-2 $\alpha$ -III (8-iso-PGF2a).** Boxplots represent median, 1<sup>st</sup> quartile, 3<sup>rd</sup> quartile, 5<sup>th</sup> percentile, 95<sup>th</sup> percentile, and outliers.

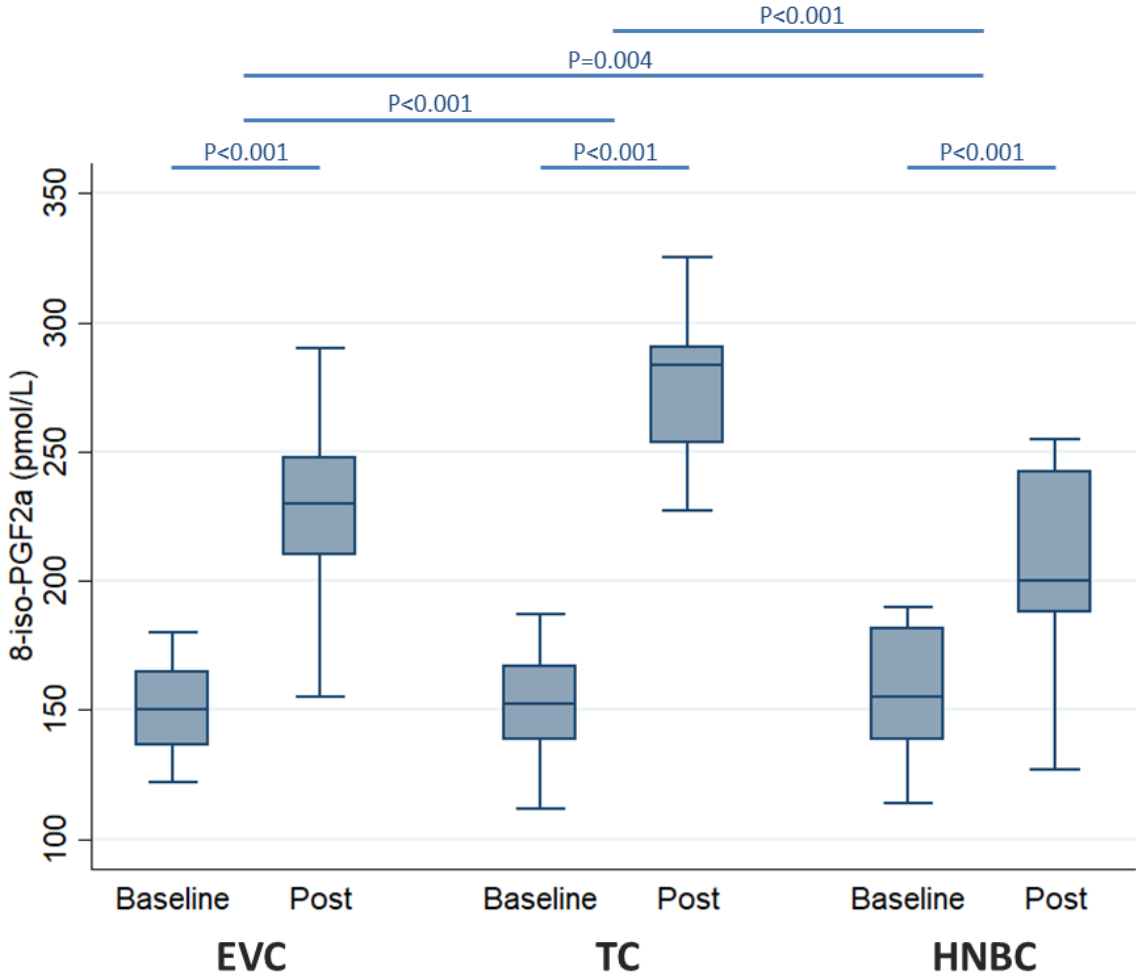

**Figure S4. Impact of using electronic vaping cigarette (EVC), traditional tobacco cigarette (TC), and heat-not-burn cigarette (HNBC) on vitamin E.**

Boxplots represent median, 1<sup>st</sup> quartile, 3<sup>rd</sup> quartile, 5<sup>th</sup> percentile, 95<sup>th</sup> percentile, and outliers.

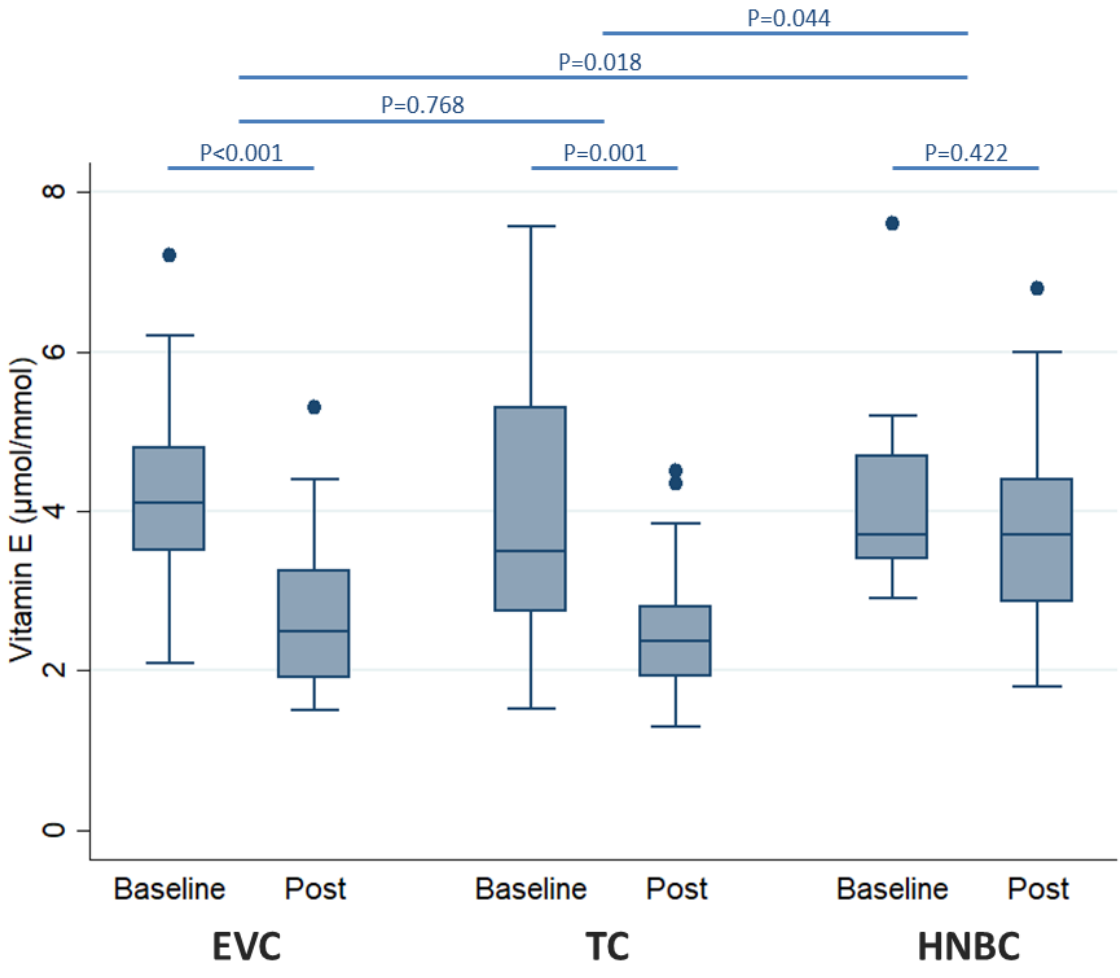



**Figure S5. Impact of using electronic vaping cigarette (EVC), traditional tobacco cigarette (TC), and heat-not-burn cigarette (HNBC) on hydrogen peroxide (H<sub>2</sub>O<sub>2</sub>) breakdown activity (HBA). Boxplots represent median, 1<sup>st</sup> quartile, 3<sup>rd</sup> quartile, 5<sup>th</sup> percentile, 95<sup>th</sup> percentile, and outliers.**

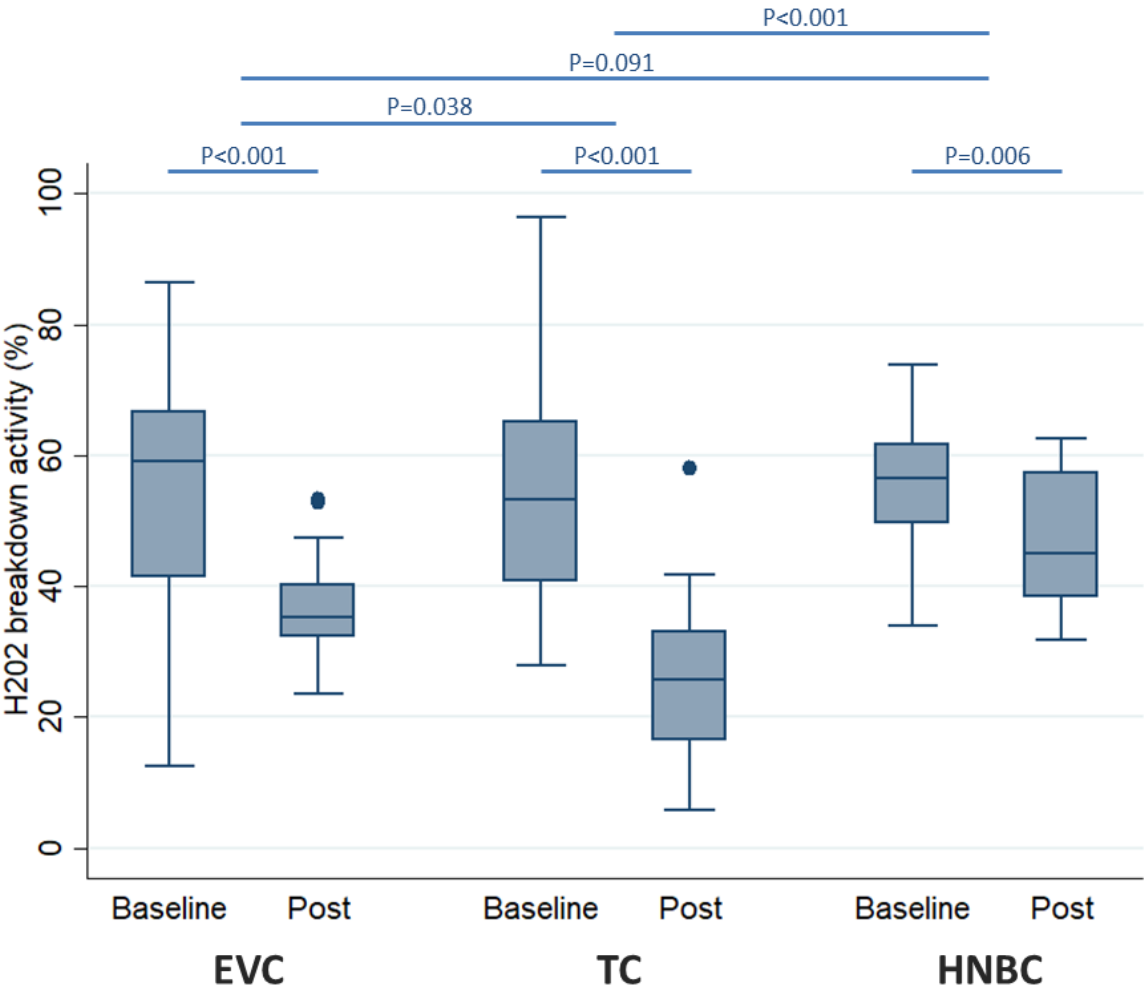

**Figure S6. Impact of using electronic vaping cigarette (EVC), traditional tobacco cigarette (TC), and heat-not-burn cigarette (HNBC) on soluble CD40 ligand.** Boxplots represent median, 1<sup>st</sup> quartile, 3<sup>rd</sup> quartile, 5<sup>th</sup> percentile, 95<sup>th</sup> percentile, and outliers.

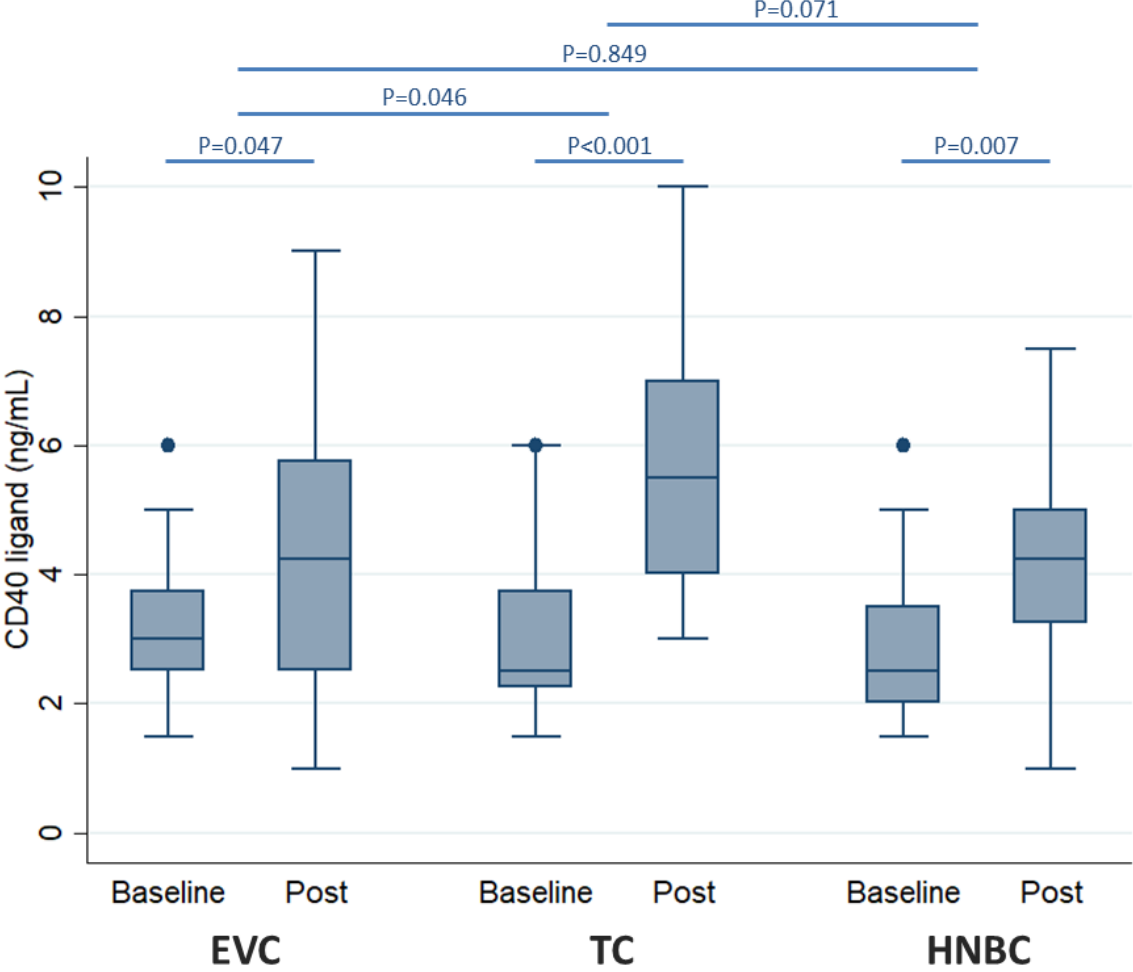

**Figure S7. Impact of using electronic vaping cigarette (EVC), traditional tobacco cigarette (TC), and heat-not-burn cigarette (HNBC) on soluble P-selectin.** Boxplots represent median, 1<sup>st</sup> quartile, 3<sup>rd</sup> quartile, 5<sup>th</sup> percentile, 95<sup>th</sup> percentile, and outliers.

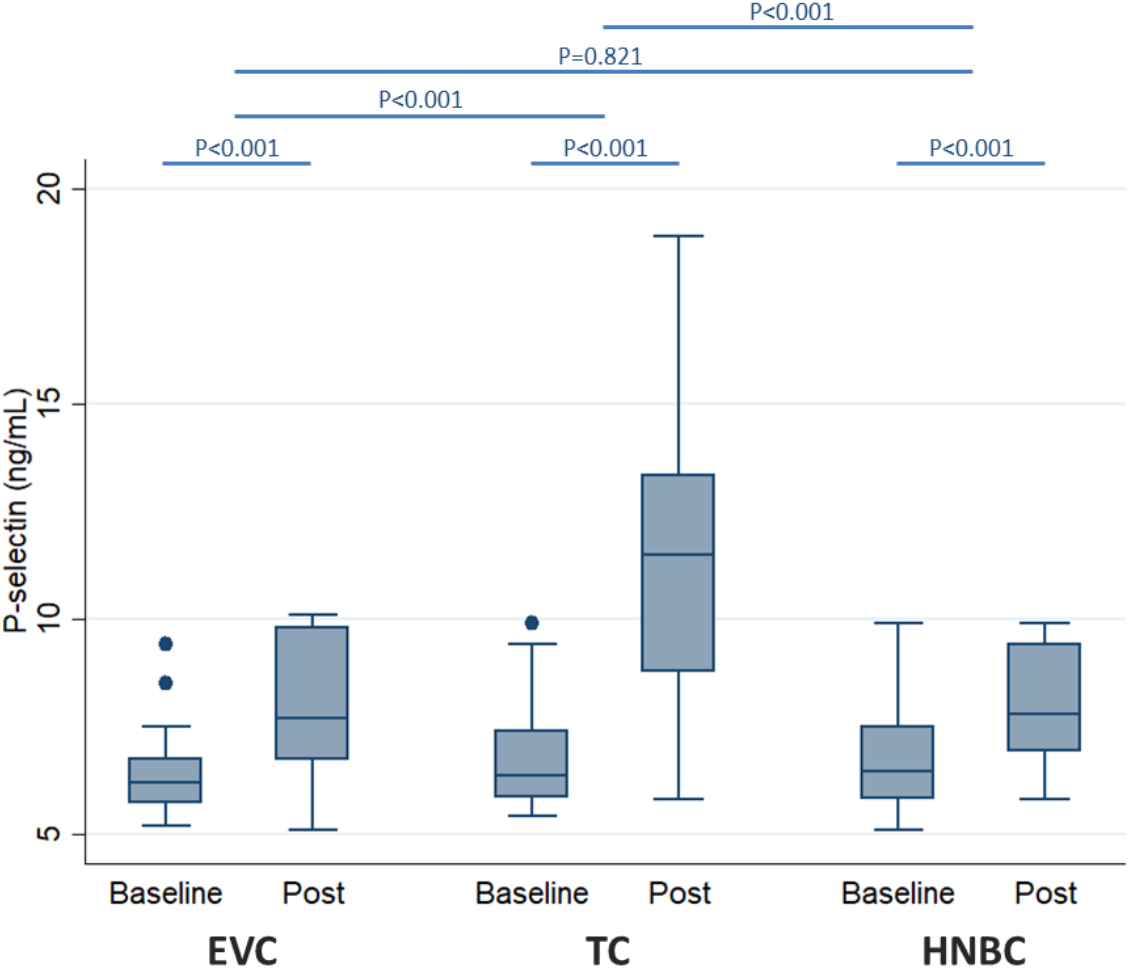

**Figure S8. Impact of using electronic vaping cigarette (EVC), traditional tobacco cigarette (TC), and heat-not-burn cigarette (HNBC) on systolic blood pressure (SBP). Boxplots represent median, 1<sup>st</sup> quartile, 3<sup>rd</sup> quartile, 5<sup>th</sup> percentile, 95<sup>th</sup> percentile, and outliers.**

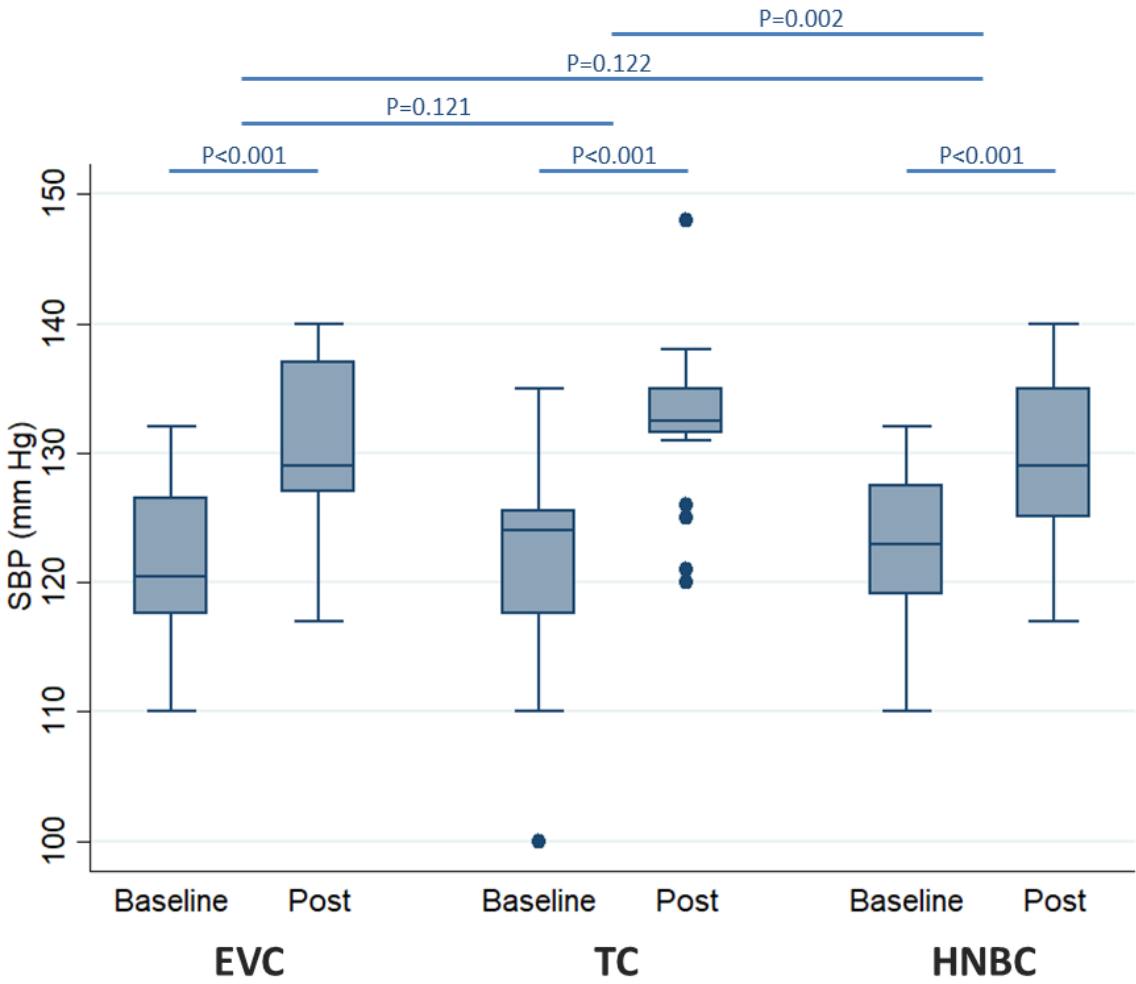

**Figure S9. Impact of using electronic vaping cigarette (EVC), traditional tobacco cigarette (TC), and heat-not-burn cigarette (HNBC) on diastolic blood pressure (DBP). Boxplots represent median, 1<sup>st</sup> quartile, 3<sup>rd</sup> quartile, 5<sup>th</sup> percentile, 95<sup>th</sup> percentile, and outliers.**

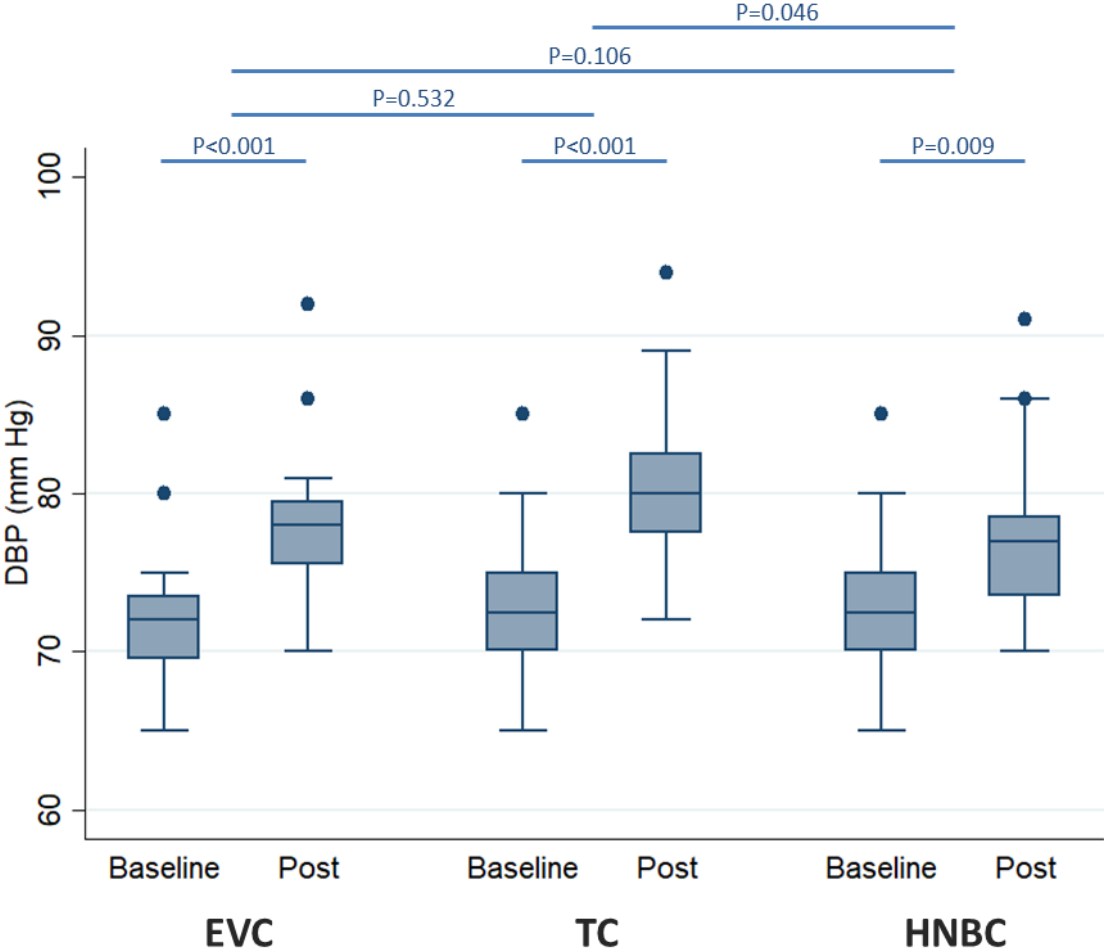

**Figure S10. Impact of using electronic vaping cigarette (EVC), traditional tobacco cigarette (TC), and heat-not-burn cigarette (HNBC) on mean blood pressure (MBP). Boxplots represent median, 1<sup>st</sup> quartile, 3<sup>rd</sup> quartile, 5<sup>th</sup> percentile, 95<sup>th</sup> percentile, and outliers.**

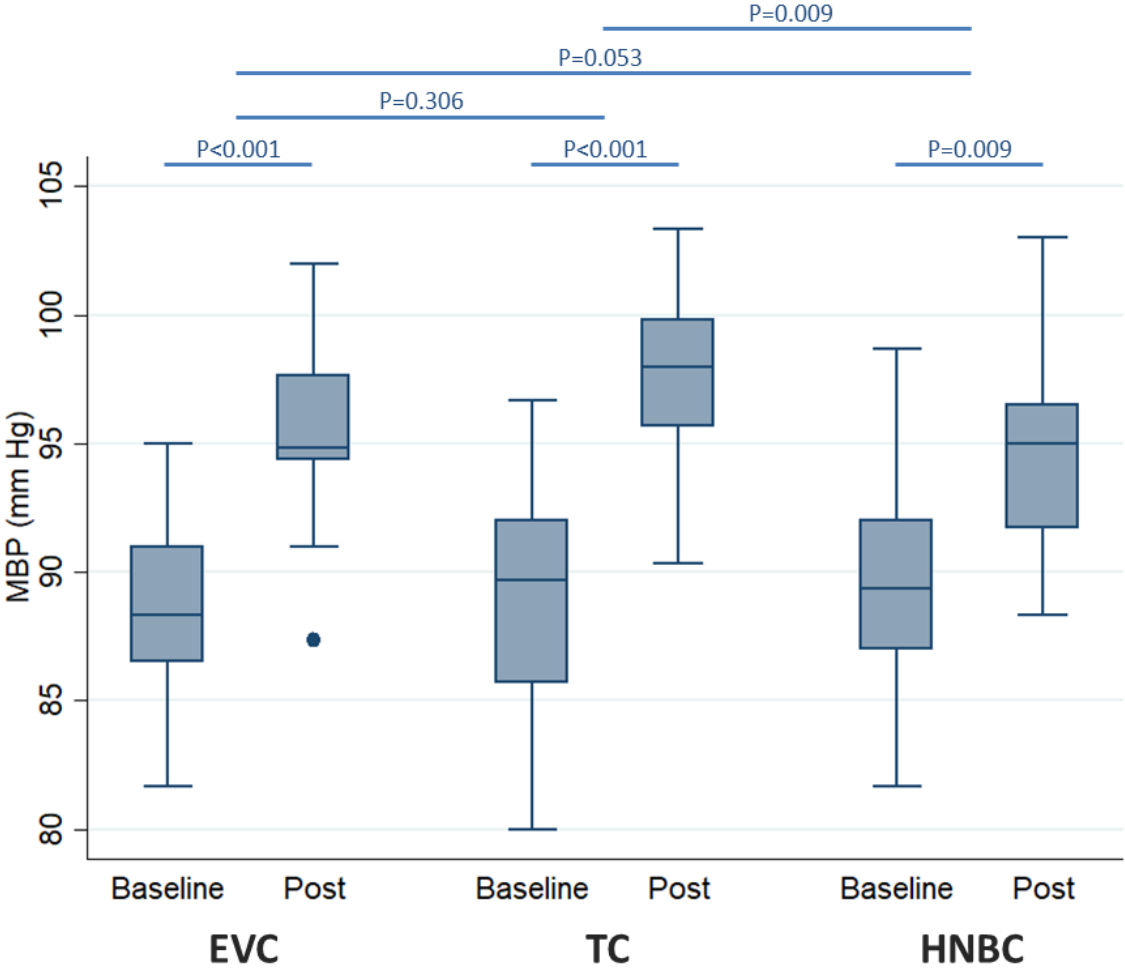

**Figure S11. Impact of using electronic vaping cigarette (EVC), traditional tobacco cigarette (TC), and heat-not-burn cigarette (HNBC) on nitric oxide (NO) bioavailability.** Boxplots represent median, 1<sup>st</sup> quartile, 3<sup>rd</sup> quartile, 5<sup>th</sup> percentile, 95<sup>th</sup> percentile, and outliers.

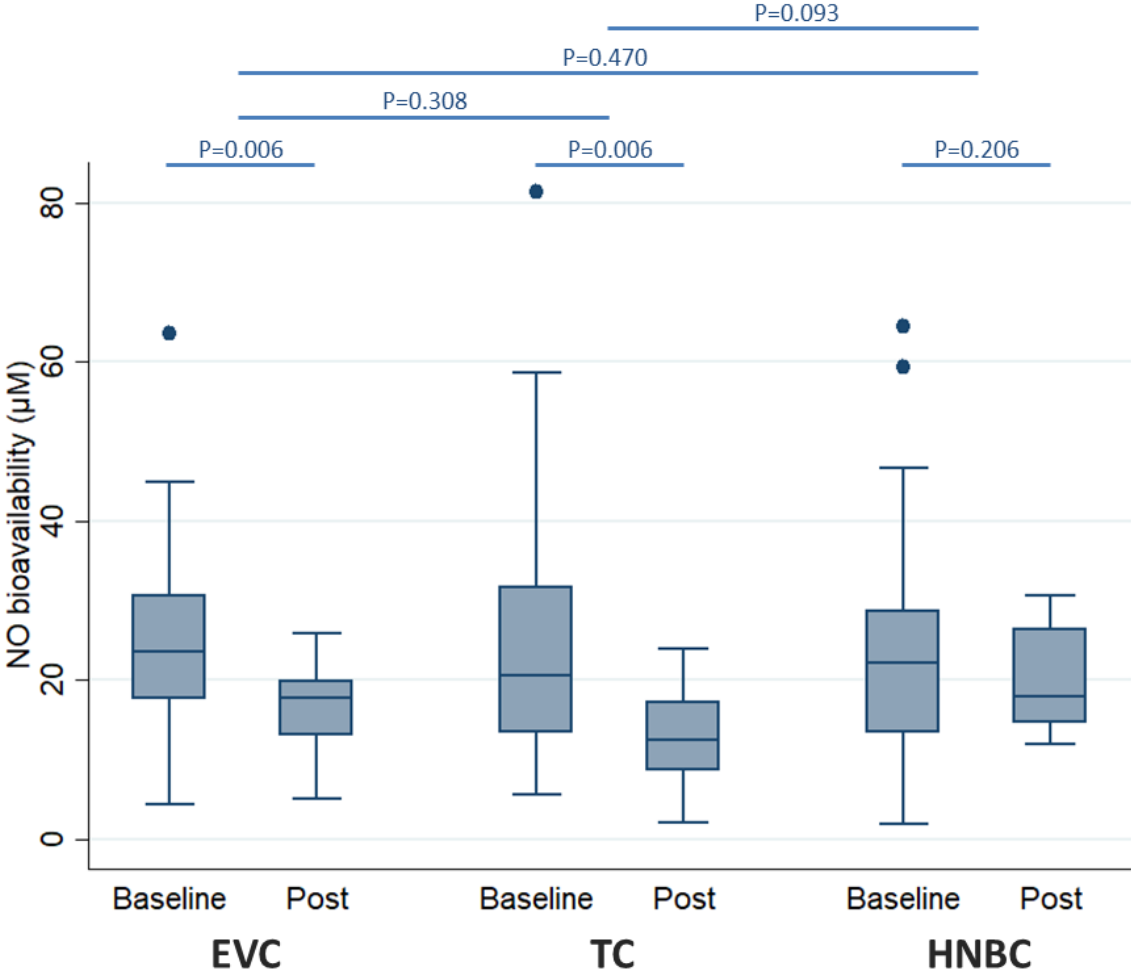

**Figure S12. Impact of using electronic vaping cigarette (EVC), traditional tobacco cigarette (TC), and heat-not-burn cigarette (HNBC) on smoking satisfaction, appraised with the explicit question “Was the cigarette enjoyable?”, and answers scored using a subjective scale from 0 (no effect) to 100 (maximum effect). Boxplots represent median, 1<sup>st</sup> quartile, 3<sup>rd</sup> quartile, 5<sup>th</sup> percentile, 95<sup>th</sup> percentile, and outliers.**

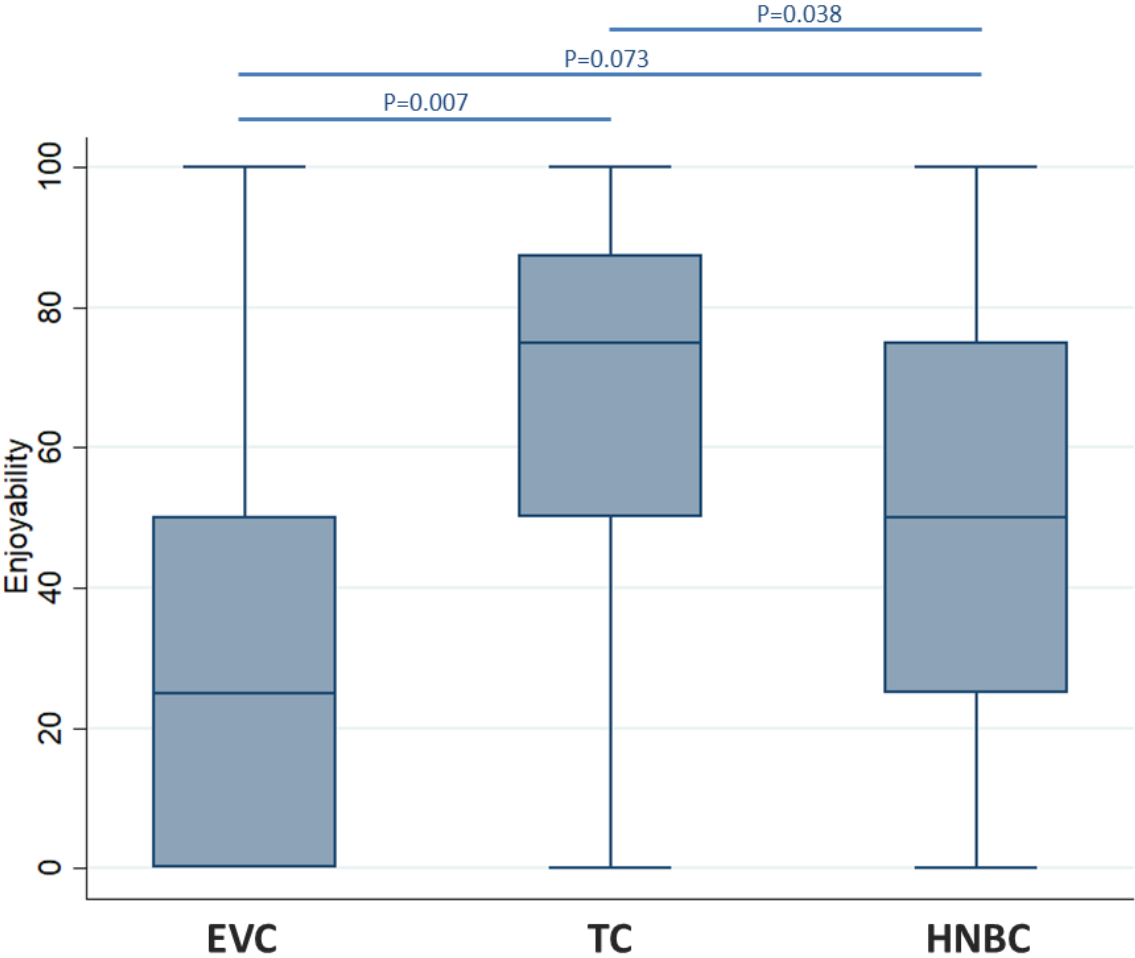



**Figure S13. Impact of using electronic vaping cigarette (EVC), traditional tobacco cigarette (TC), and heat-not-burn cigarette (HNBC) on smoking satisfaction, appraised with the explicit question “Was the cigarette satisfying?”, and answers scored using a subjective scale from 0 (no effect) to 100 (maximum effect). Boxplots represent median, 1<sup>st</sup> quartile, 3<sup>rd</sup> quartile, 5<sup>th</sup> percentile, 95<sup>th</sup> percentile, and outliers.**

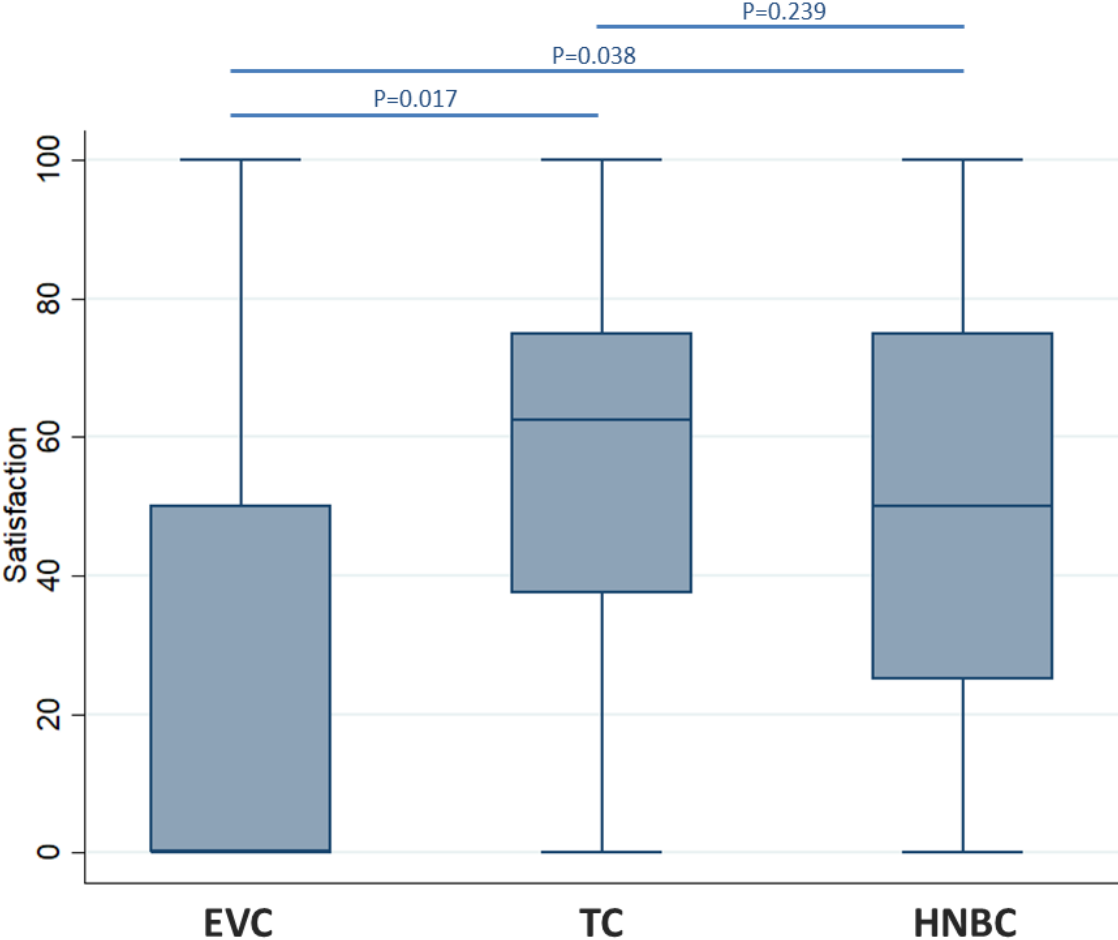

**Figure S14. Impact of using electronic vaping cigarette (EVC), traditional tobacco cigarette (TC), and heat-not-burn cigarette (HNBC) on smoking satisfaction, appraised with the explicit question “Soon after smoking did your desire for another cigarette decrease?”, and answers scored using a subjective scale from 0 (no effect) to 100 (maximum effect). Boxplots represent median, 1<sup>st</sup> quartile, 3<sup>rd</sup> quartile, 5<sup>th</sup> percentile, 95<sup>th</sup> percentile, and outliers.**

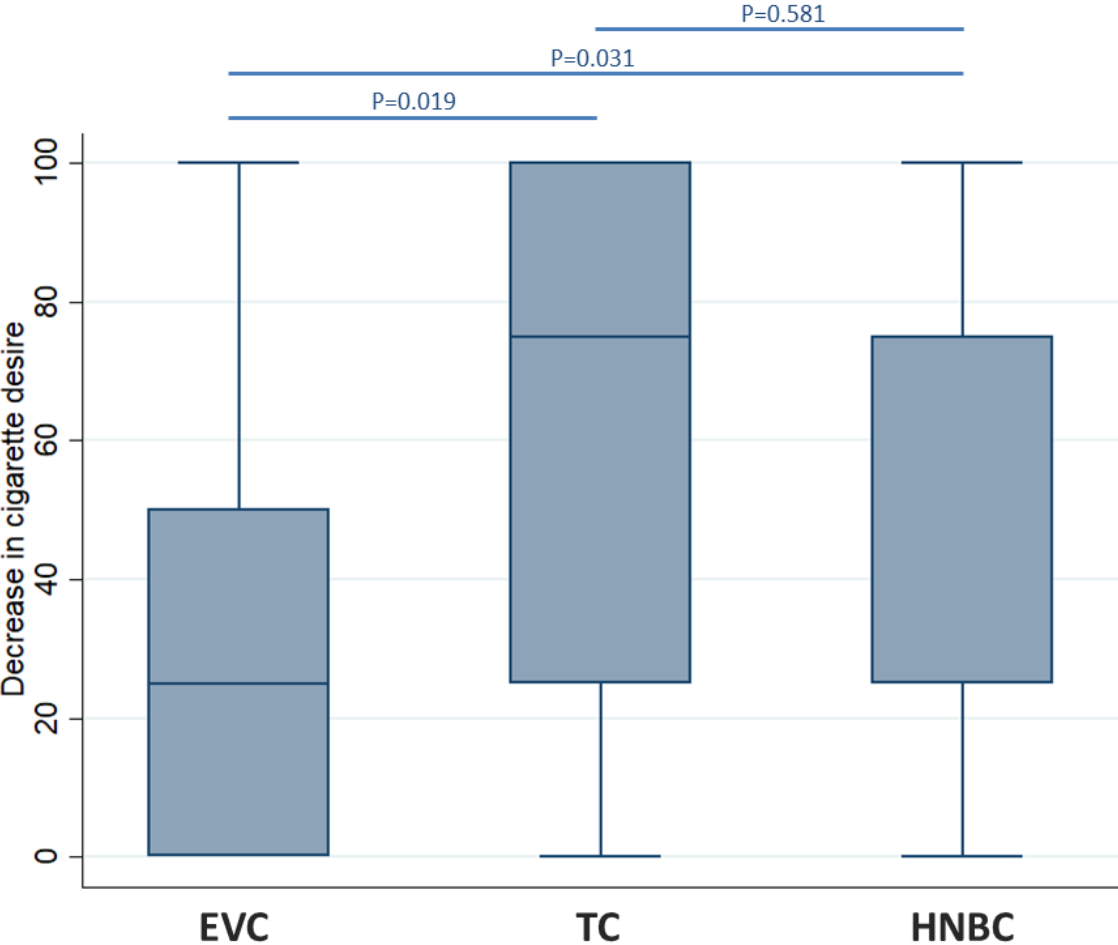

Supplement: JAH3-8-e010455-s001.pdf [file JAH3-8-e010455-s001.pdf]
